# Supplementary material
Source: PubMed Central journal article supplement (PMC5866790)
Supplement: NIHMS946217-supplement.pdf [file NIHMS946217-supplement.pdf]

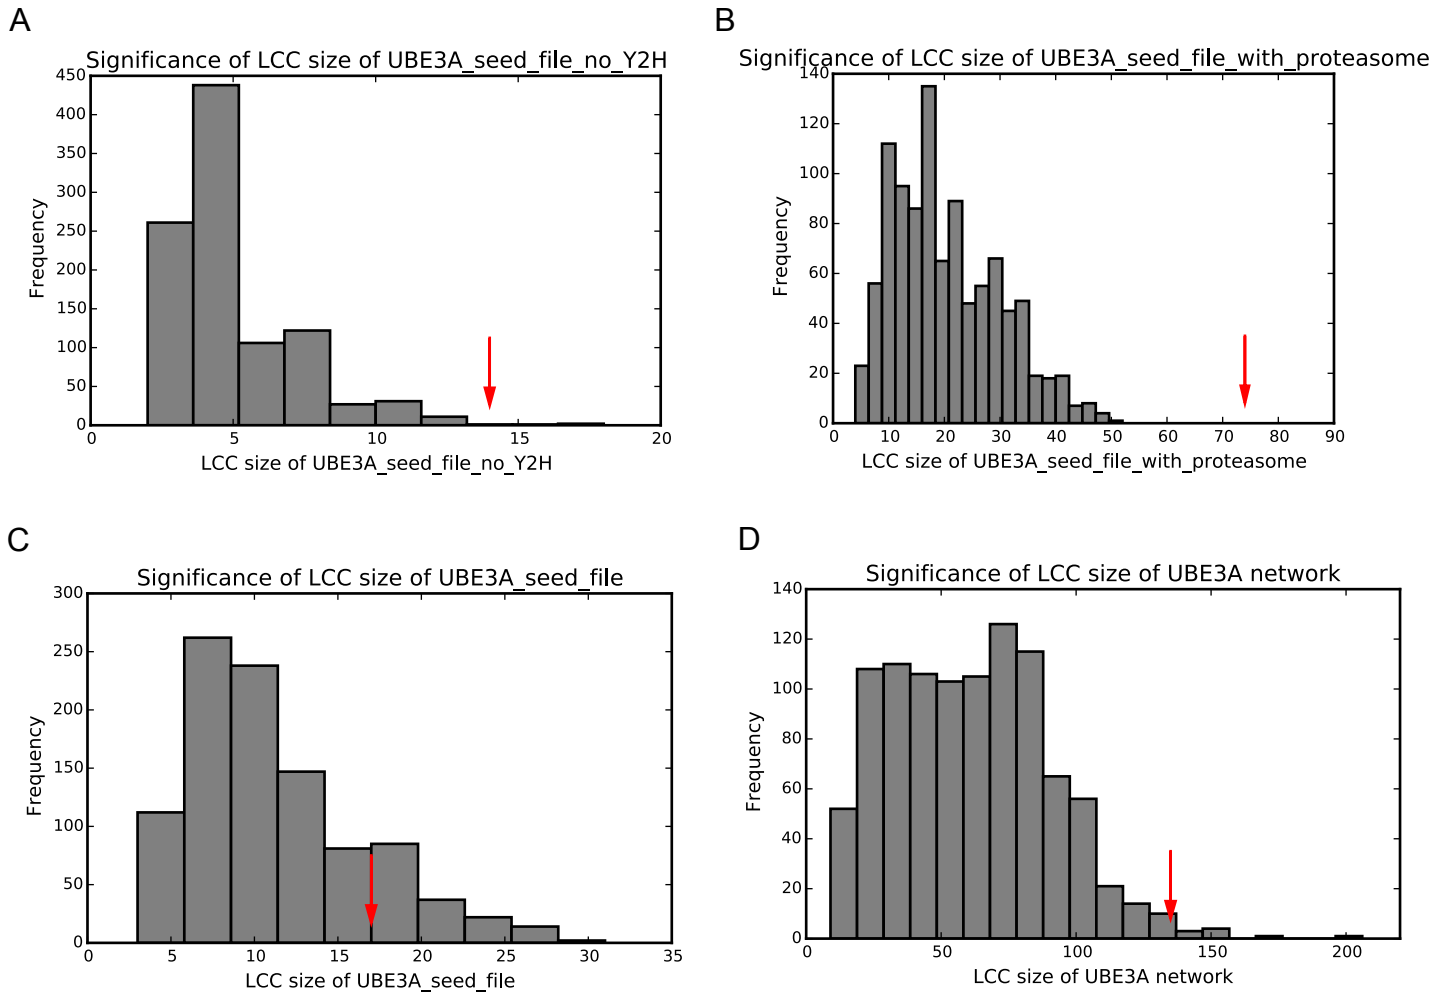

**Figure S1.** Significances of closeness in QBCHL of different sets of UBE3A interactors. Significance of closeness were calculated by comparing the largest connected component (LCC) formed by a given set of query proteins in the QBCHL network to the LCC formed by these query proteins in 1000 degree-controlled randomized QBCHL networks. A: UBE3A interactors as identified in the AP-MS screens without the proteasome subunits. B: UBE3A interactors as identified in the AP-MS screens with the proteasome subunits. C: Union of UBE3A interactors identified in the AP-MS screens or Y2H screens. D: LCC of network formed around UBE3A using QBCHL. The corresponding lists of query proteins can be found on GitHub.

Figure S2.

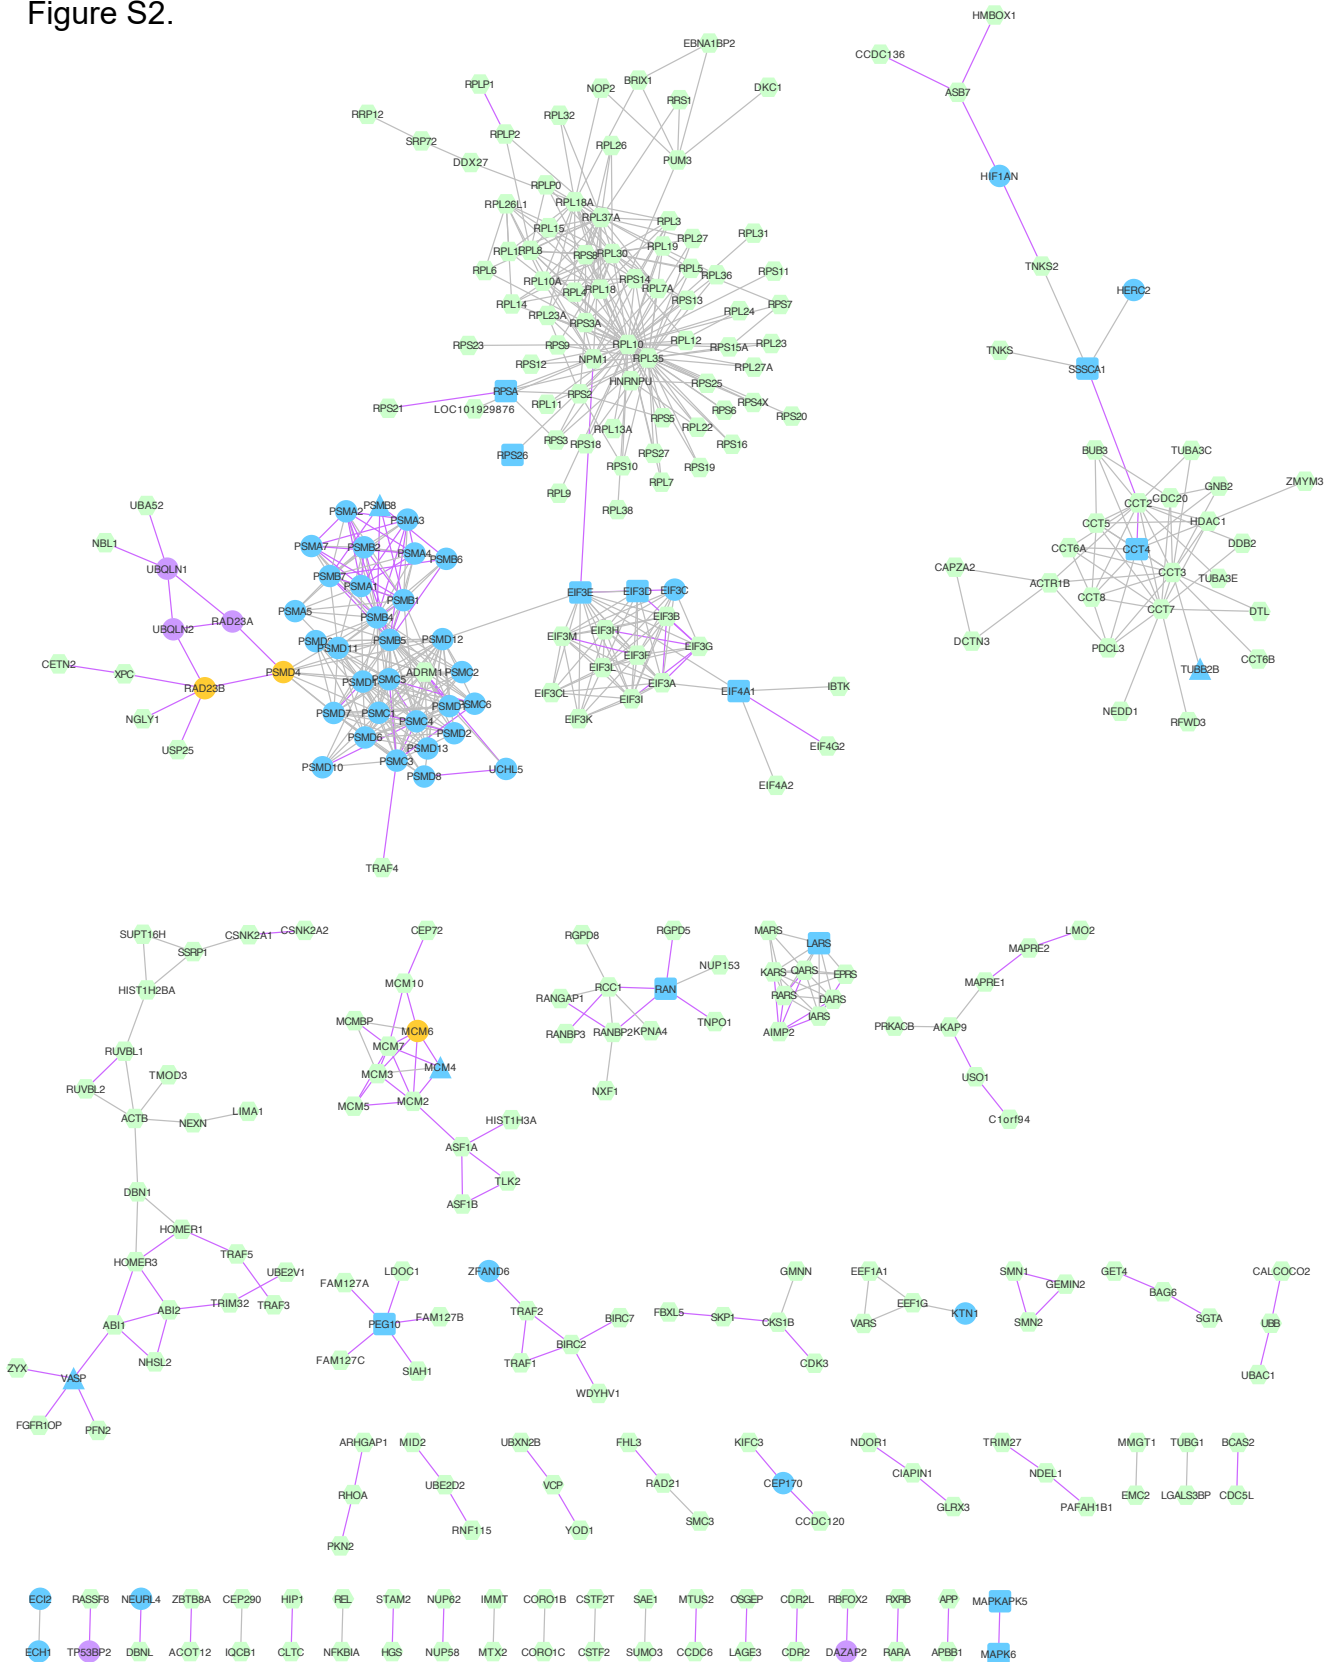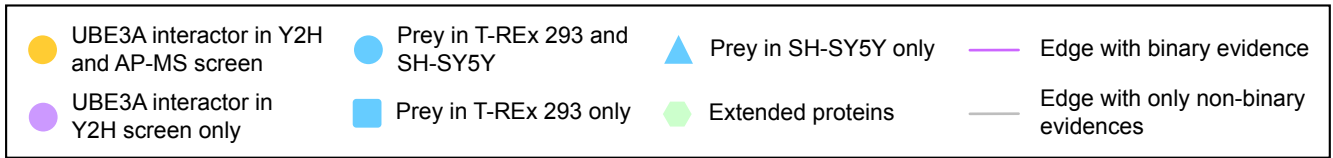

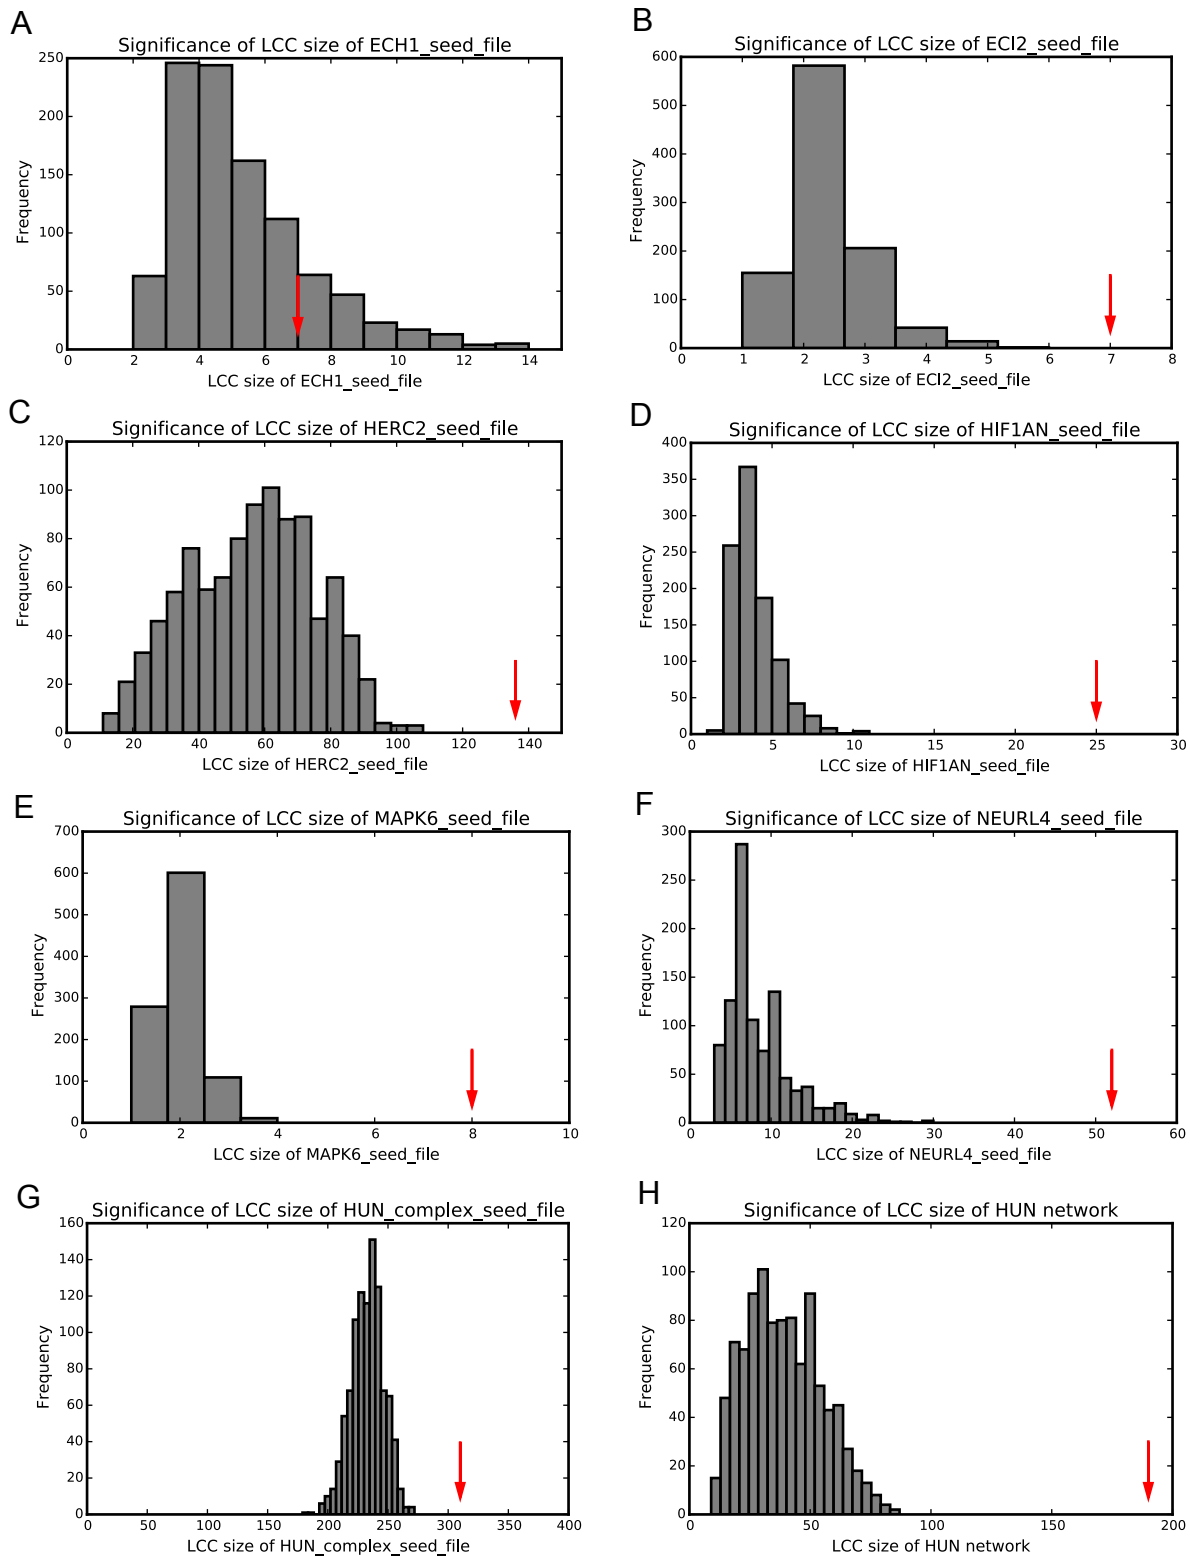

**Figure S3.** Significances of the size of the largest connected components (LCC) formed by different sets of genes in the QBCHL network. A-F: The set of preys from each individual pulldown were linked to each other using the QBCHL network. The number of preys connected to each other was compared to the number of preys connected when using 1,000 degree-controlled random QBCHL networks. Red arrows indicate the observed number of connected preys using the real network. Grey bars indicate the distribution of numbers of connected preys from the random controls. G: Union of preys from ECH1, ECI2, MAPK6, HERC2, and NEURL4 were tested for the significance of the LCC they form. H: The size of the LCC from the HUN network was tested for its significance.

Figure S4.

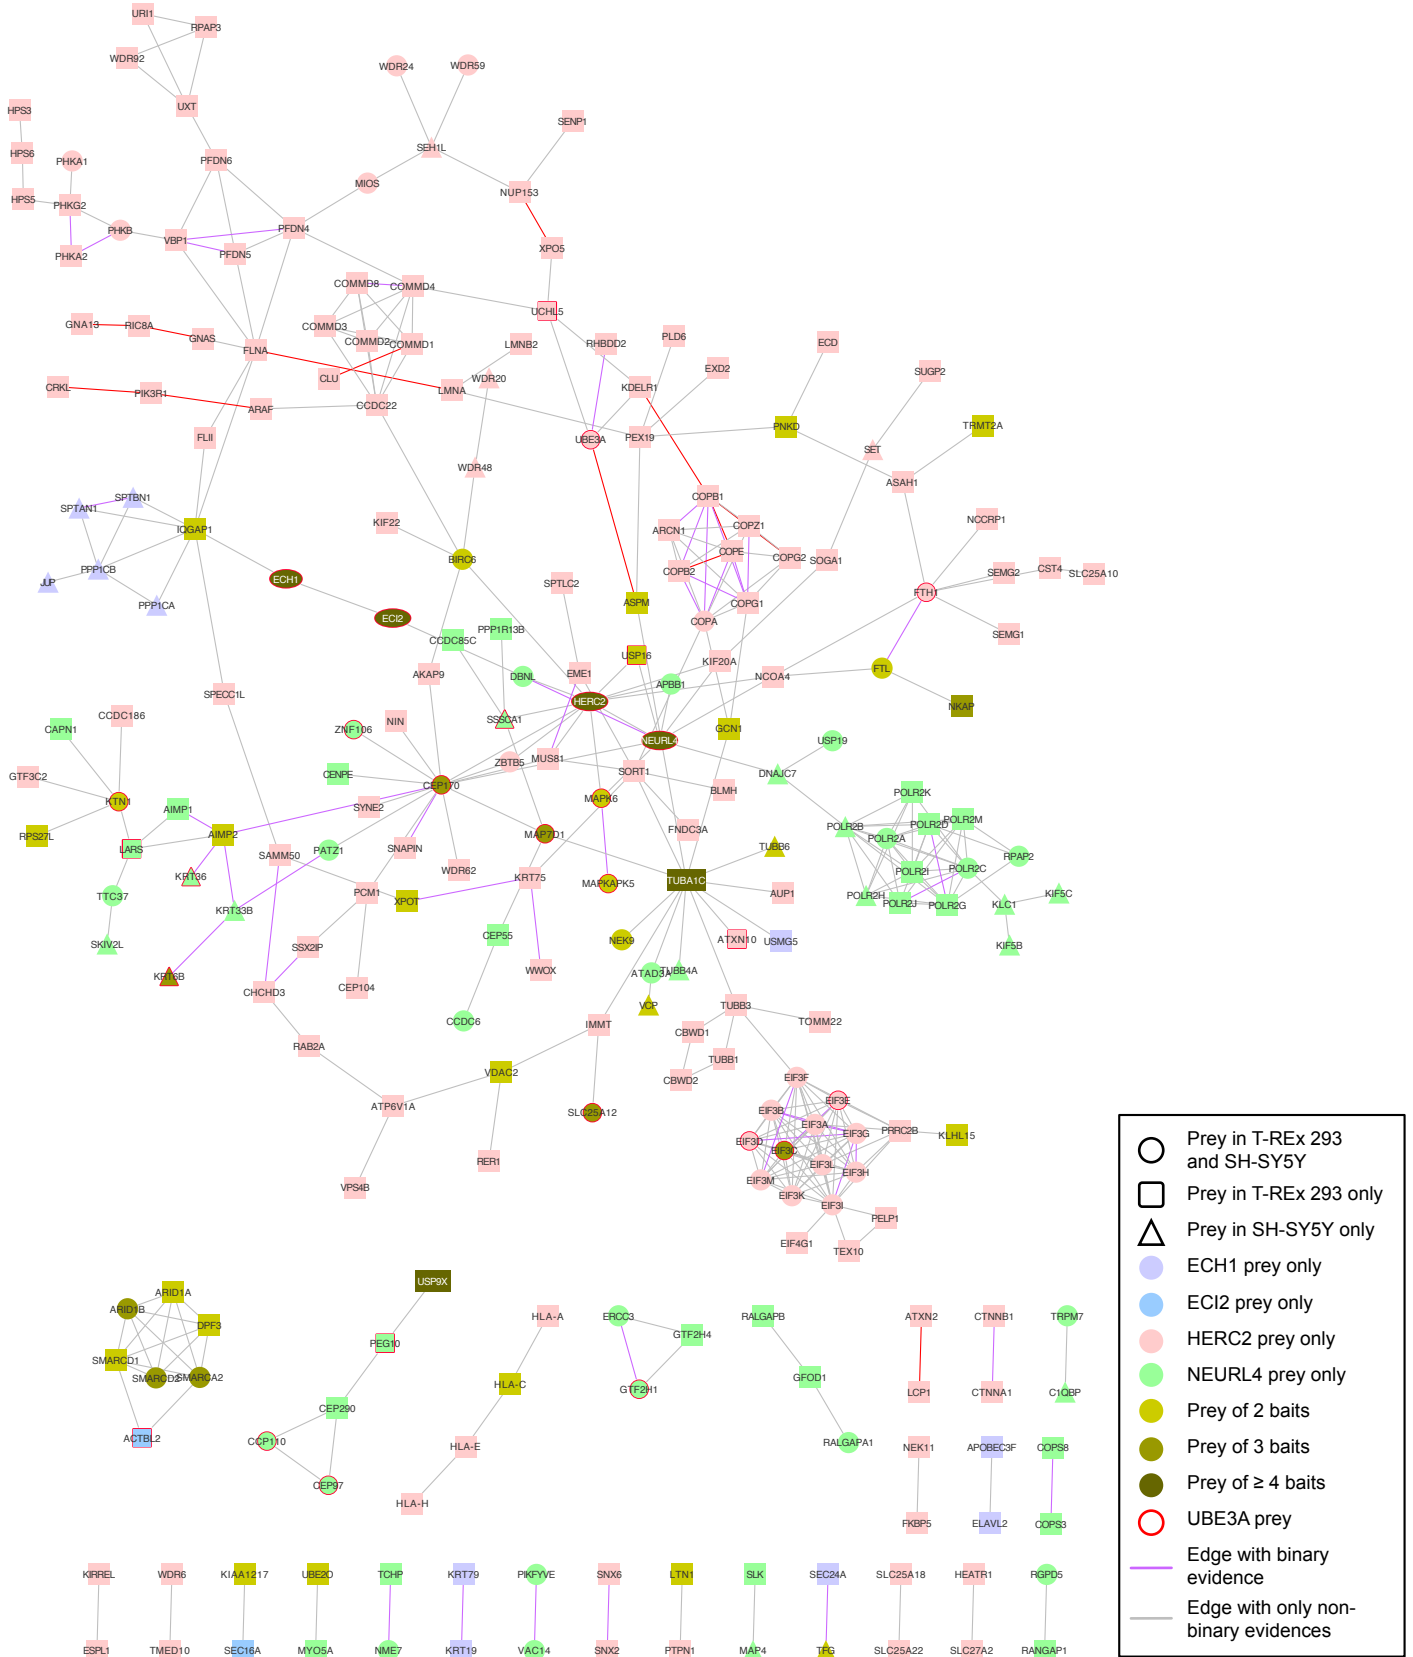

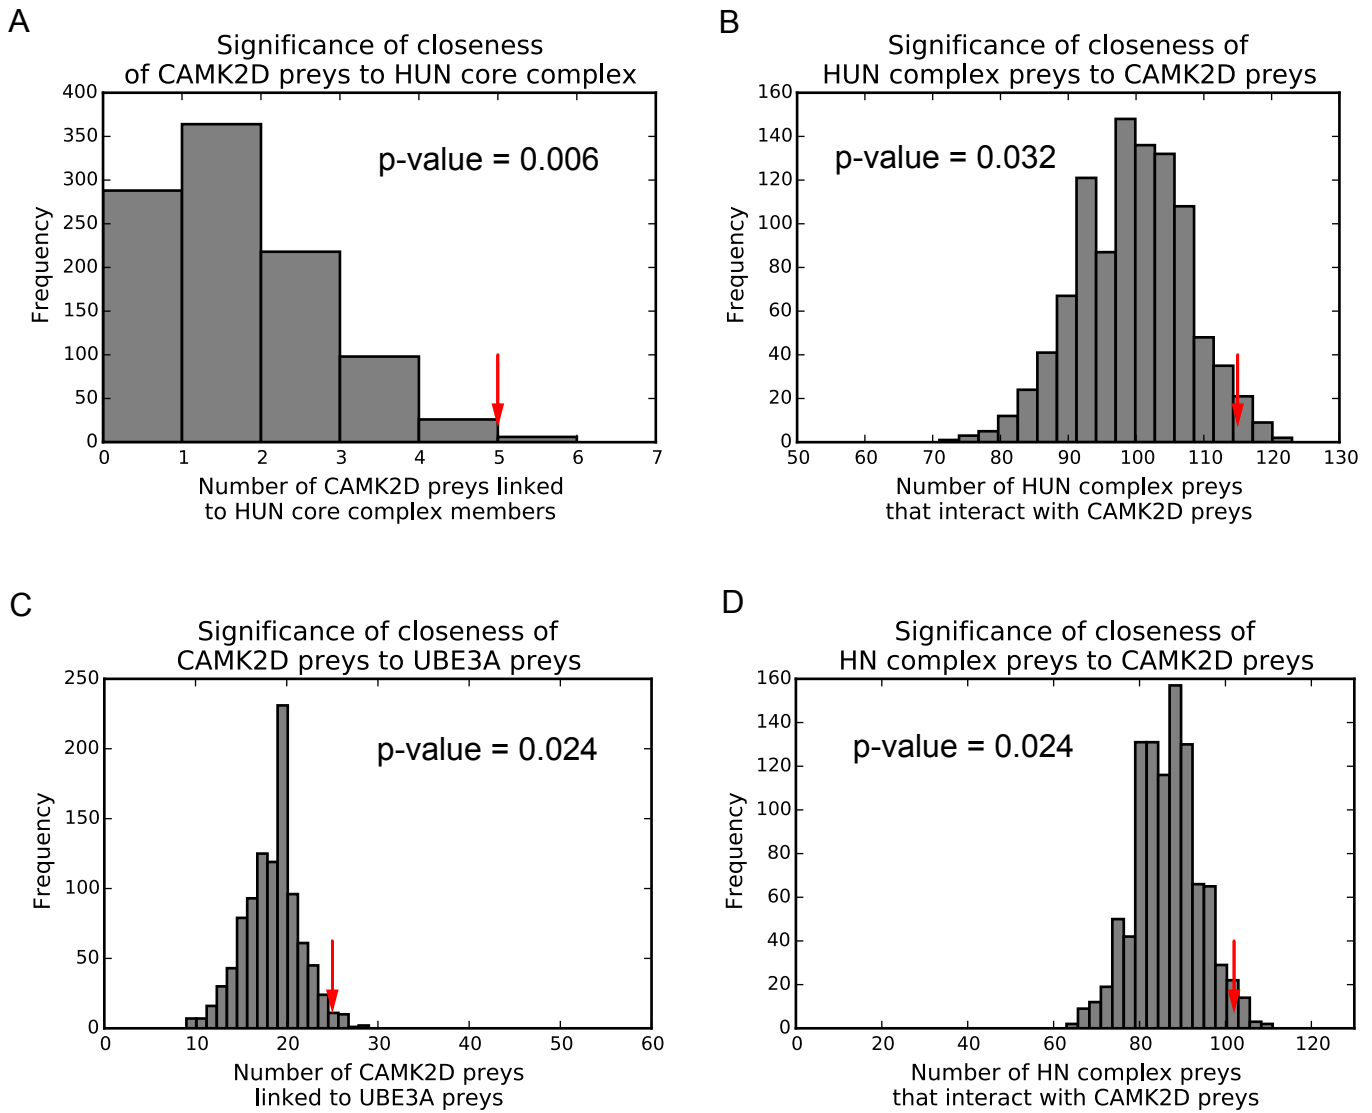

**Figure S5.** The interaction networks of CAMK2D and the HUN complex are connected. Significances were empirically determined using 1000 degree-controlled randomized QBCHL networks. Red arrows indicate the real observation. The distribution of observations from the randomizations are displayed as grey histograms.

Figure S6.

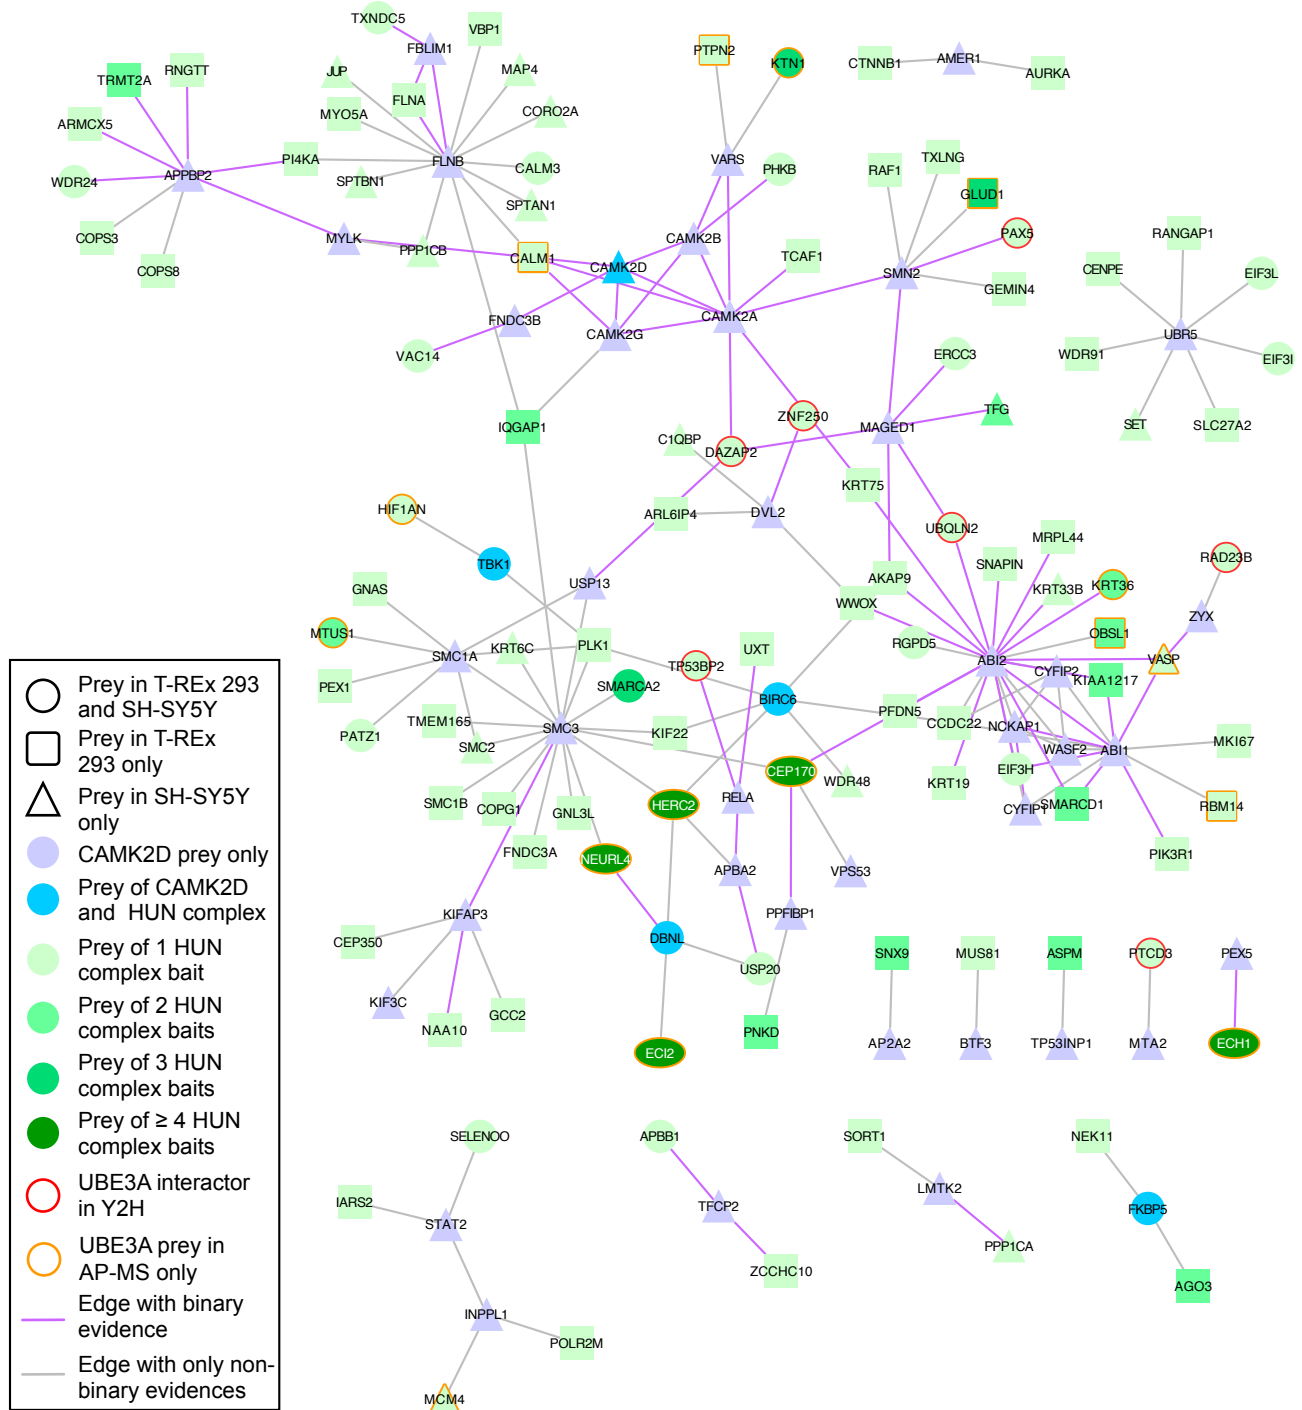

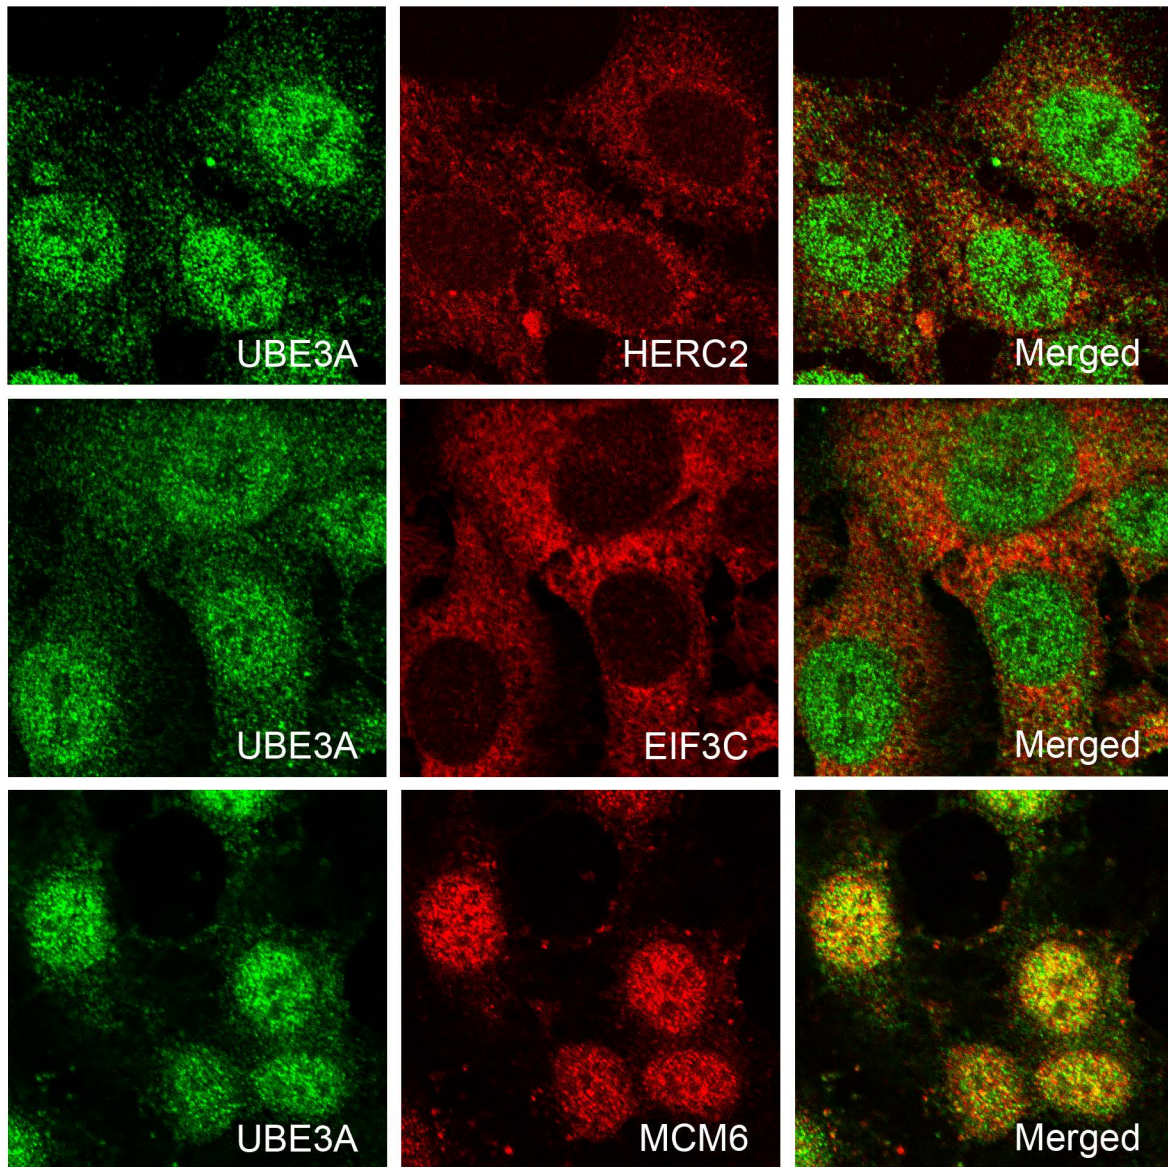

**Figure S7. UBE3A partially colocalizes with HERC2, EIF3C, and MCM6 in HaCaT cells.** UBE3A colocalizes with HERC2 and EIF3C in the cytosol and with MCM6 in the nuclei.

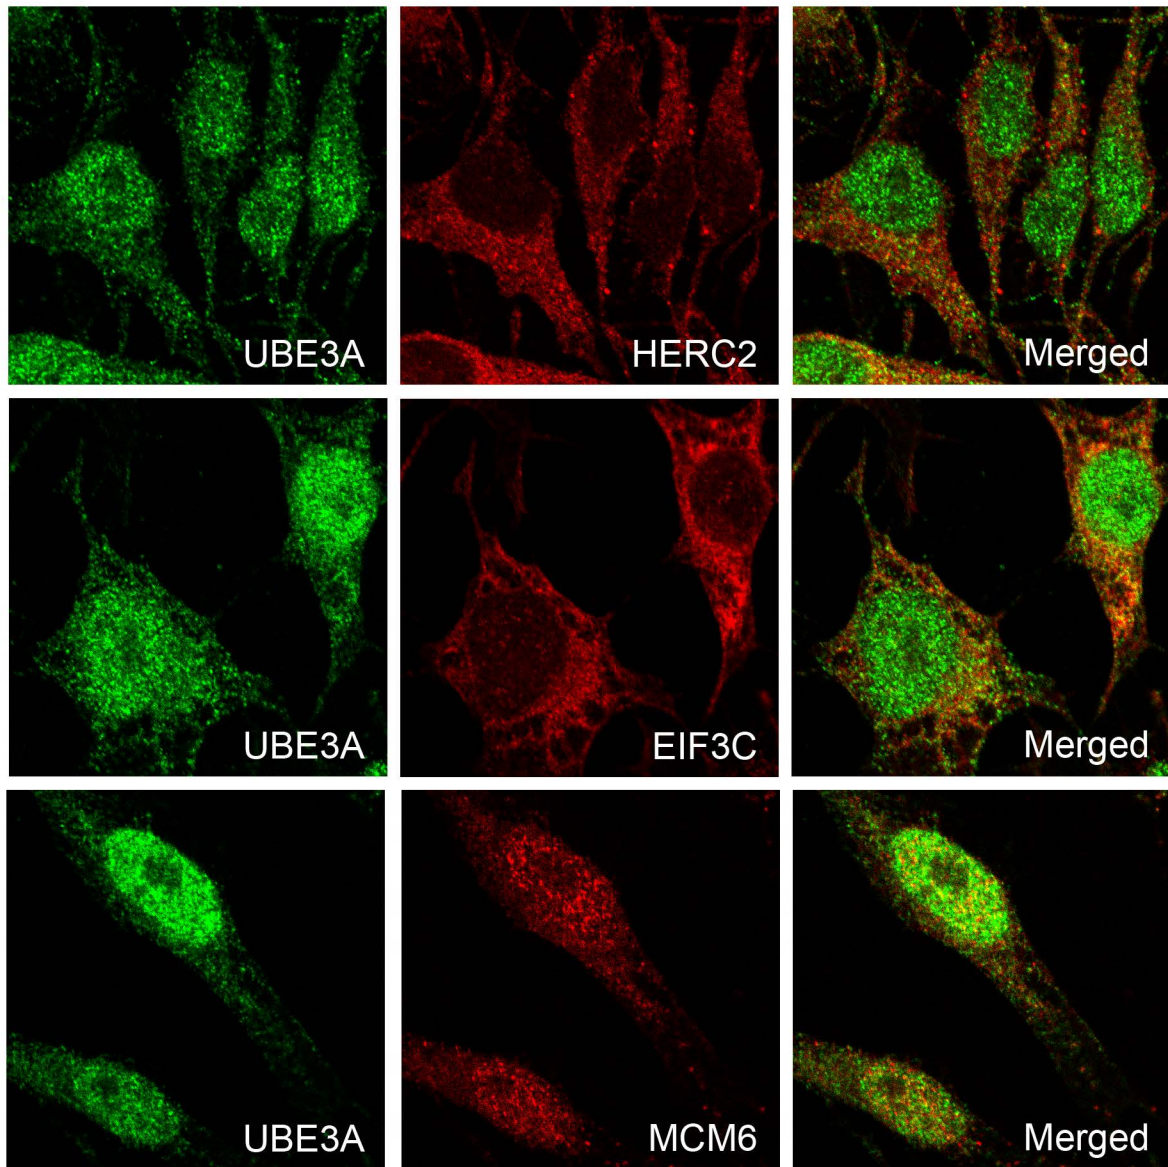

**Figure S8. UBE3A partially colocalizes with HERC2, EIF3C, and MCM6 in HeLa cells.** UBE3A colocalizes with HERC2 and EIF3C in the cytosol and with MCM6 in the nuclei.



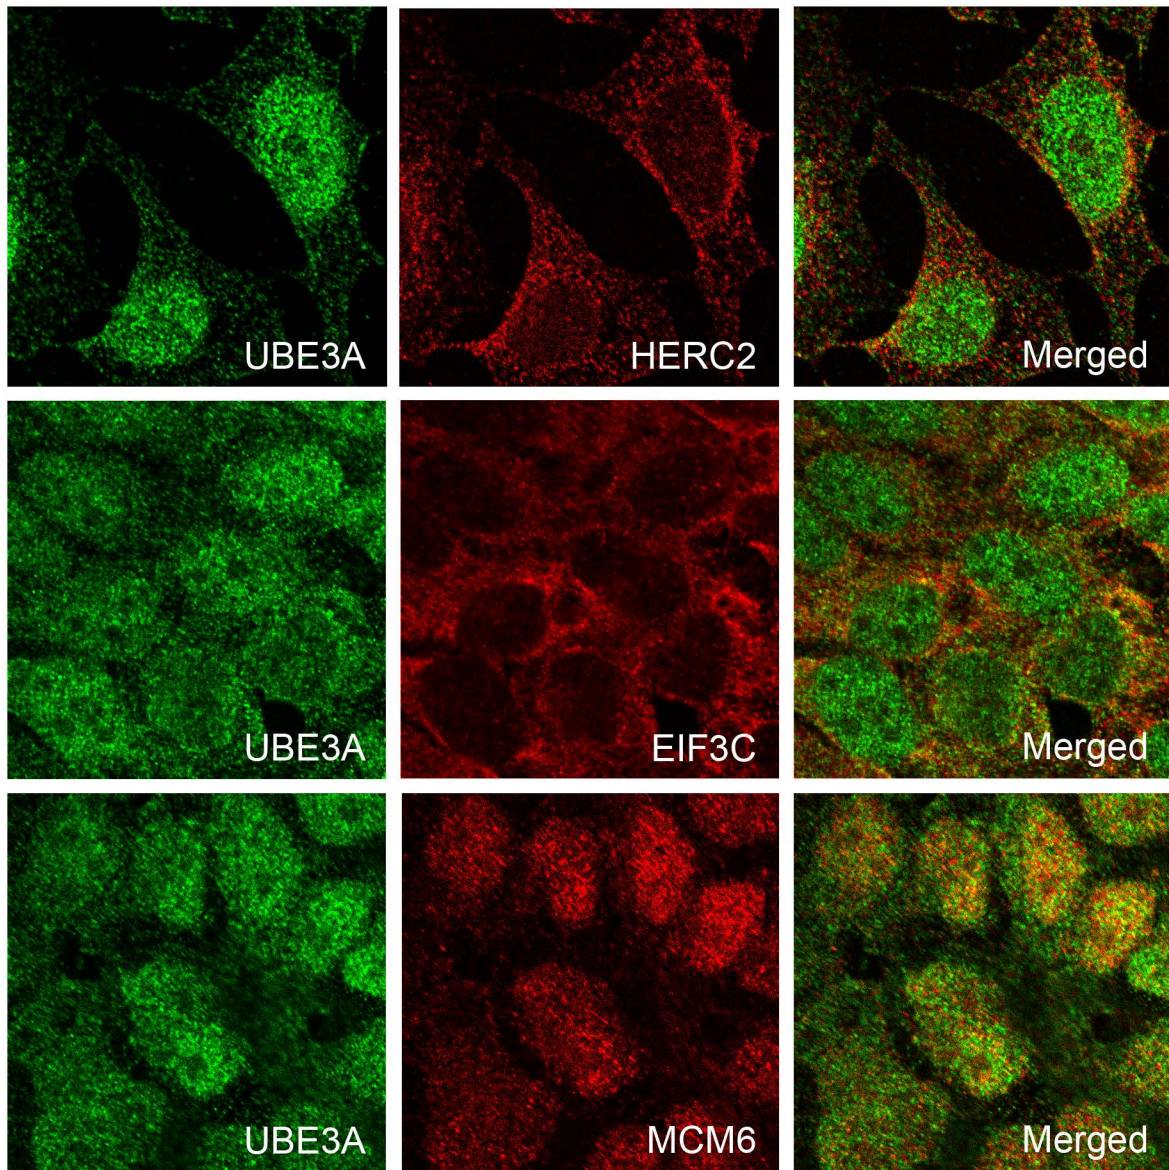

**Figure S9. UBE3A partially colocalizes with HERC2, EIF3C, and MCM6 in U2OS cells.** UBE3A colocalizes with HERC2 and EIF3C in the cytosol and with MCM6 in the nuclei.

**Table S1.** Summary of statistics to test the closeness of a given list of proteins in the QBCHL network.

| seed_file                           | p_value | mean  | std    | z_score | num_nodes<br>_real_network | size_r eal_L CC | num_equal_or_larg<br>er_rand _LCC | num_r and |
|-------------------------------------|---------|-------|--------|---------|----------------------------|-----------------|-----------------------------------|-----------|
| CAMK2D_seed_file.txt                | 0.051   | 4.016 | 1.7256 | 2.30874 | 60                         | 8               | 51                                | 1000      |
| ECH1_seed_file.txt                  | 0.173   | 4.782 | 2.0896 | 1.06144 | 65                         | 7               | 173                               | 1000      |
| ECI2_seed_file.txt                  | 0       | 2.181 | 0.7989 | 6.03205 | 32                         | 7               | 0                                 | 1000      |
| HERC2_seed_file.txt                 | 0       | 56.18 | 19.254 | 4.14566 | 278                        | 136             | 0                                 | 1000      |
| HIF1AN_seed_file.txt                | 0       | 3.424 | 1.3908 | 15.5138 | 50                         | 25              | 0                                 | 1000      |
| MAPK6_seed_file.txt                 | 0       | 1.852 | 0.6404 | 9.60044 | 30                         | 8               | 0                                 | 1000      |
| NEURL4_seed_file.txt                | 0       | 8.666 | 4.0722 | 10.6415 | 134                        | 52              | 0                                 | 1000      |
| UBE3A_seed_file.txt                 | 0.16    | 11.13 | 5.1922 | 1.12996 | 95                         | 17              | 160                               | 1000      |
| UBE3A_seed_file_with_proteasome.txt | 0       | 20.33 | 9.5641 | 5.61204 | 116                        | 74              | 0                                 | 1000      |
| UBE3A_seed_file_no_Y2H.txt          | 0.004   | 4.961 | 2.1775 | 4.1511  | 82                         | 14              | 4                                 | 1000      |

P-values are determined based on comparison of the largest connected component (LCC) formed by the list of query proteins to the LCC formed by these query proteins in 1,000 degree-controlled random networks.

**Table S2.** Library of pulldowns from SH-SY5Y cells used as reference for CompPASS analysis.

| <sup>a</sup> Bait | <sup>b</sup> Peptides | <sup>c</sup> Proteins | <sup>a</sup> Bait | <sup>b</sup> Peptides | <sup>c</sup> Proteins |
|-------------------|-----------------------|-----------------------|-------------------|-----------------------|-----------------------|
| AKT1              | 341                   | 351                   | PHB               | 102                   | 763                   |
| AMPH              | 137                   | 76                    | PLK1              | 108                   | 578                   |
| ARC               | 43                    | 268                   | PPP2CA            | 58                    | 336                   |
| ARIH2             | 230                   | 71                    | PRKCE             | 270                   | 214                   |
| BEGAIN            | 121                   | 222                   | PTPN18            | 61                    | 426                   |
| BRCC3             | 35                    | 151                   | PXN               | 128                   | 39                    |
| BSND              | 95                    | 692                   | RBCK1             | 94                    | 382                   |
| CAMK2D            | 336                   | 308                   | RCAN1             | 62                    | 283                   |
| CDKL5             | 184                   | 489                   | SNCA              | 84                    | 489                   |
| CHAF1B            | 83                    | 540                   | SNCG              | 74                    | 80                    |
| CHEK2             | 127                   | 316                   | SPG21             | 64                    | 211                   |
| CSK               | 441                   | 208                   | SRC               | 207                   | 80                    |
| ECH1              | 41                    | 479                   | STAT4             | 76                    | 438                   |
| ECI2              | 24                    | 353                   | TCTE1             | 33                    | 408                   |
| FOSL1             | 10                    | 408                   | TGFB111           | 60                    | 320                   |
| GLTSCR1           | 75                    | 527                   | TIMP1             | 3                     | 245                   |
| GSK3B             | 54                    | 87                    | TP53              | 5                     | 314                   |
| HIF1AN            | 109                   | 511                   | UBE3A             | 314                   | 390                   |
| HPRT1             | 113                   | 251                   | UBOX5             | 135                   | 263                   |
| JUN               | 37                    | 571                   | UBQLN2            | 105                   | 297                   |
| KIAA1217          | 195                   | 590                   | UCHL3             | 177                   | 48                    |
| MAML1             | 93                    | 483                   | UCHL5             | 135                   | 206                   |
| MAPK6             | 23                    | 329                   | USP14             | 537                   | 250                   |
| MECP2             | 99                    | 561                   | USP15             | 365                   | 237                   |
| MYC               | 9                     | 542                   | USP16             | 31                    | 289                   |
| NCOA4             | 18                    | 522                   | USP20             | 64                    | 311                   |
| NEDD4             | 239                   | 136                   | USP5              | 598                   | 194                   |
| NEURL4            | 111                   | 566                   | VCPIP1            | 195                   | 272                   |
| NIPA1             | 9                     | 271                   | WFS1              | 441                   | 403                   |
| ODC1              | 45                    | 636                   | WHSC1L1           | 167                   | 684                   |
| PARK2             | 141                   | 181                   | WHSC2             | 128                   | 473                   |
| PARK7             | 142                   | 290                   | WNK1              | 44                    | 445                   |

<sup>a</sup> Baits: HA-tagged protein used as bait in the HA-pulldown. <sup>b</sup> Peptides: total number of peptides of the bait protein detected by mass spectrometry. <sup>c</sup> Proteins: total number of proteins detected by mass spectrometry in a HA-pulldown.
